# Supplementary material
Source: publisher site journal article supplement (https://www.dovepress.com/article/331622)
Supplement: Supplementary file 1 [file get_supplementary_file.php]

**Supplementary information**

***Patient letter***


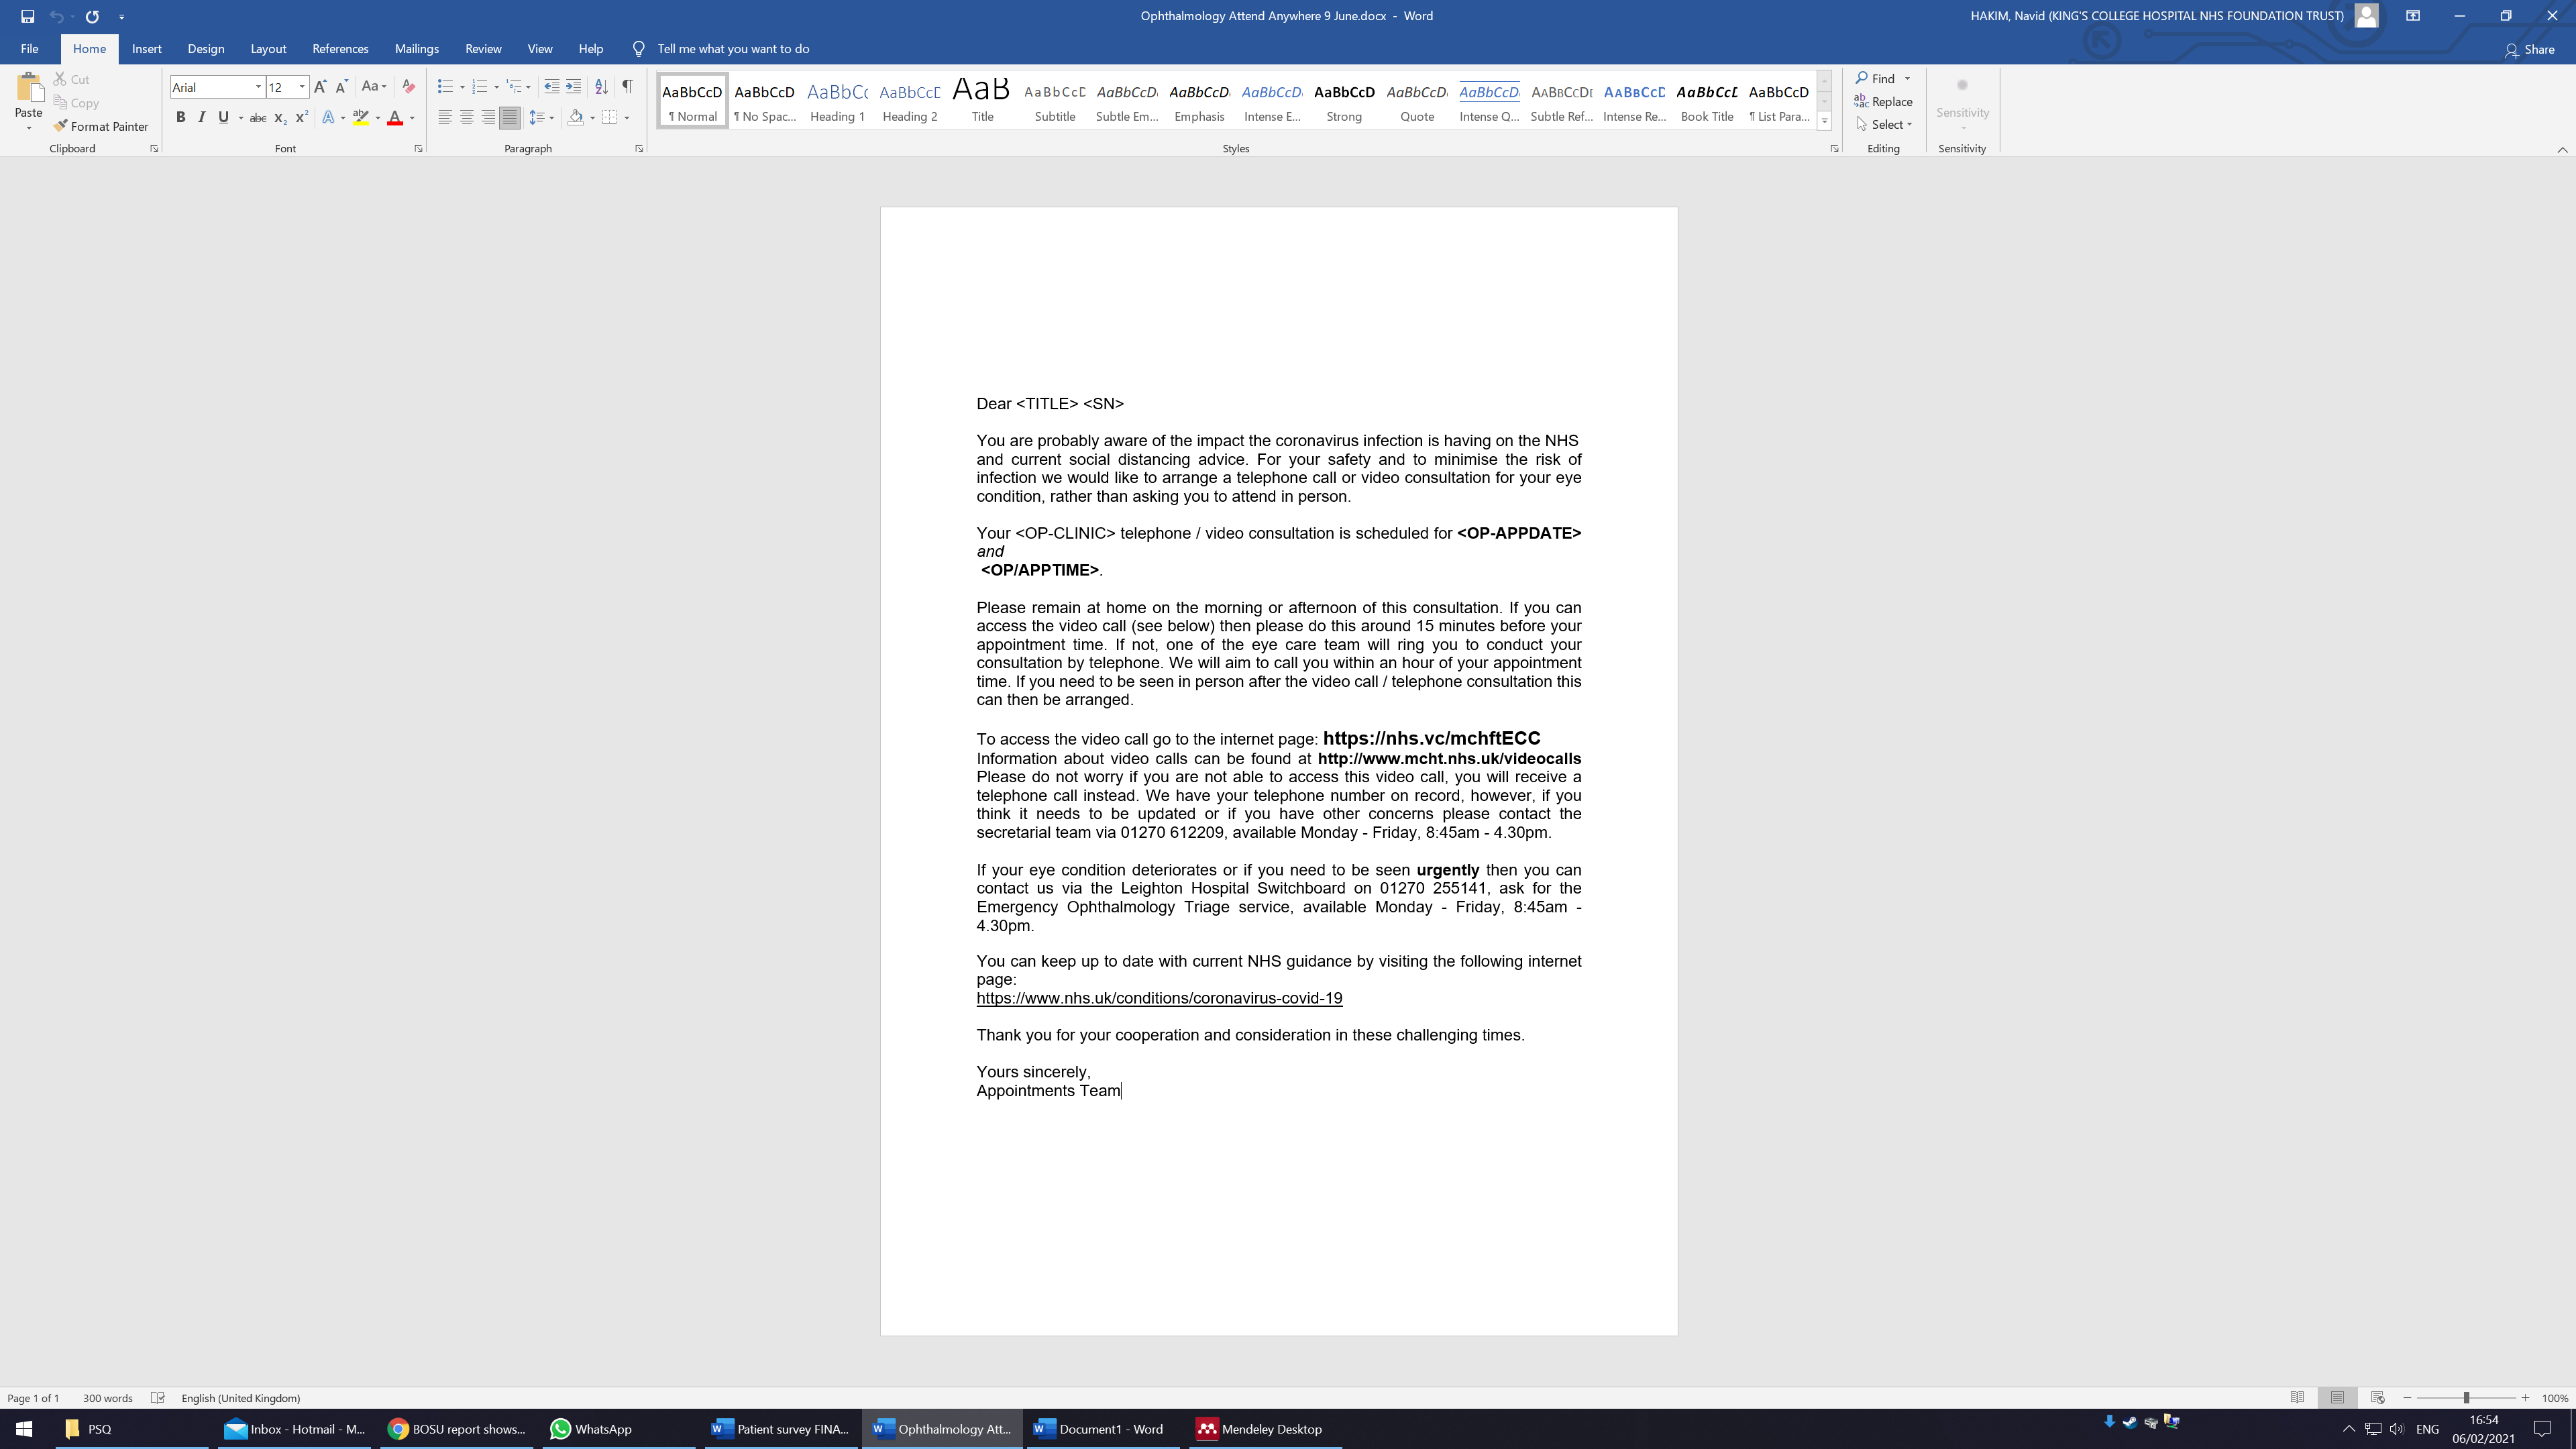


***Attend Anywhere URL***

https://www.attendanywhere.com

| ***Diagnoses of remote consultation clinic* Diagnosis** | **Number** |
| --- | --- |
| Dry eyes | 13 |
| Fuchs endothelial dystrophy | 7 |
| Meibomian gland disease | 6 |
| Corneal graft | 4 |
| Conjunctivitis | 3 |
| Corneal dystrophy | 3 |
| Corneal scarring | 3 |
| Herpes Simplex Keratitis | 3 |
| Corneal vascularisation | 2 |
| Pterygium | 2 |
| Blepharitis | 1 |
| Cataract | 1 |
| Concretions | 1 |
| Mucous membrane pemphigoid | 1 |
| Post-YAG posterior capsulotomy | 1 |
| TOTAL | 51 |

***Patient follow-up***

***Patient follow-up duration***
